# Supplementary material for: Virulence of Pseudomonas aeruginosa in Cystic Fibrosis: Relationships between Normoxia and Anoxia Lifestyle
Source: MDPI journal article supplement (doi:10.3390/antibiotics13010001), 2023-12-19
Supplement: s1 [file s1]

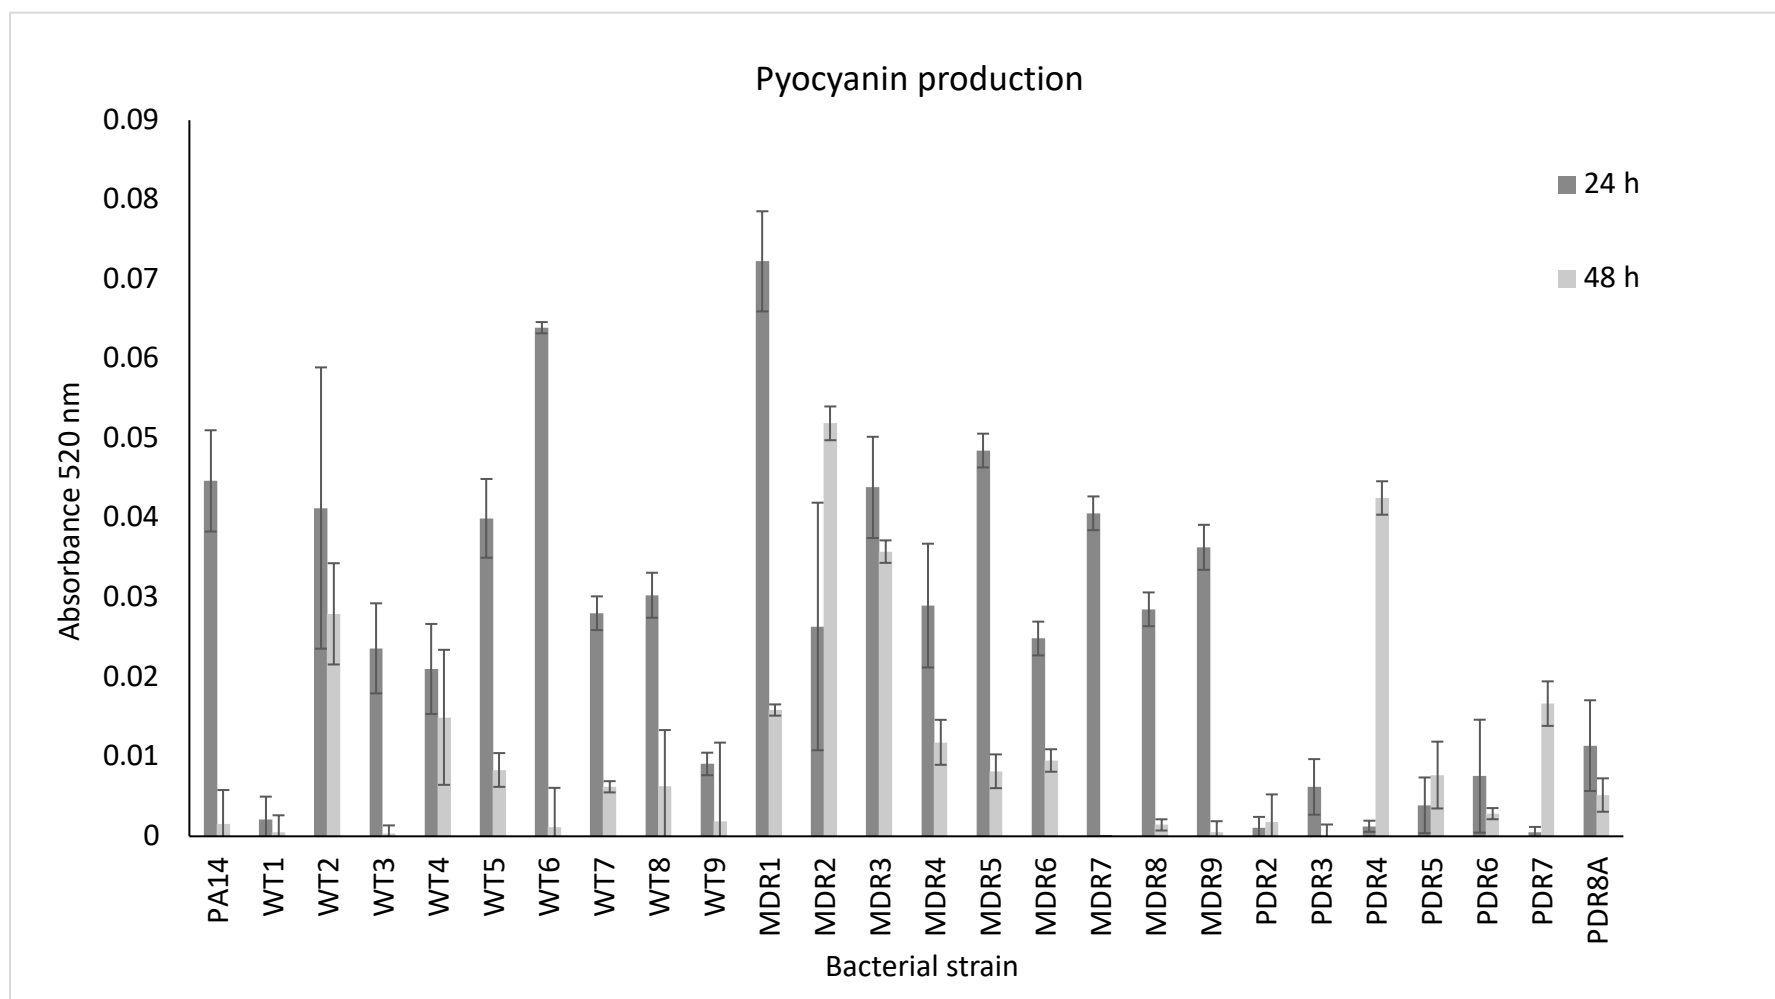

**Figure S1.** Pyocyanin production of *P. aeruginosa* clinical and reference strains. Pyocyanin production was evaluated after 24 h and 48 h of incubation at 37 °C in normoxia. The data are reported as OD at 520nm after pyocyanin extraction. Each data point represents the mean  $\pm$  SD of 2 independent experiments, each performed in 3-replicates. Error bars indicate the standard deviations of all the measurements. WT: wild type, sensitive strains; MDR: multi-drug resistant strains; PDR: pan-drug resistant strains.

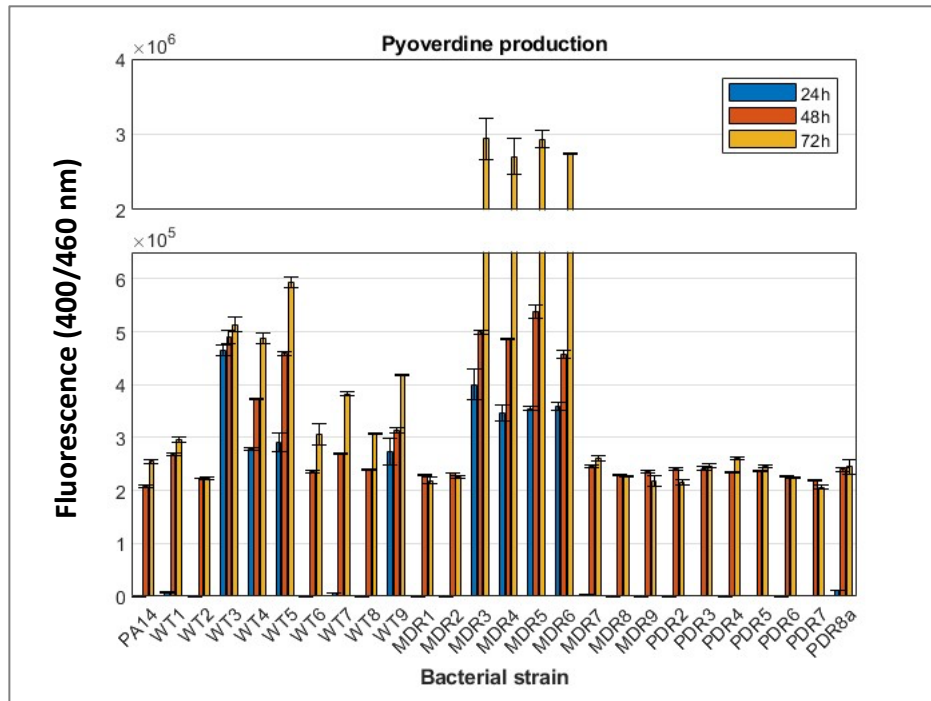

**Figure S2.** Pyoverdine production of WT, MDR and PDR strains at 24 h, 48 h and 72 h in normoxia. WT: wild type, sensitive strains; MDR: multi-drug resistant strains; PDR: pan-drug resistant strains.

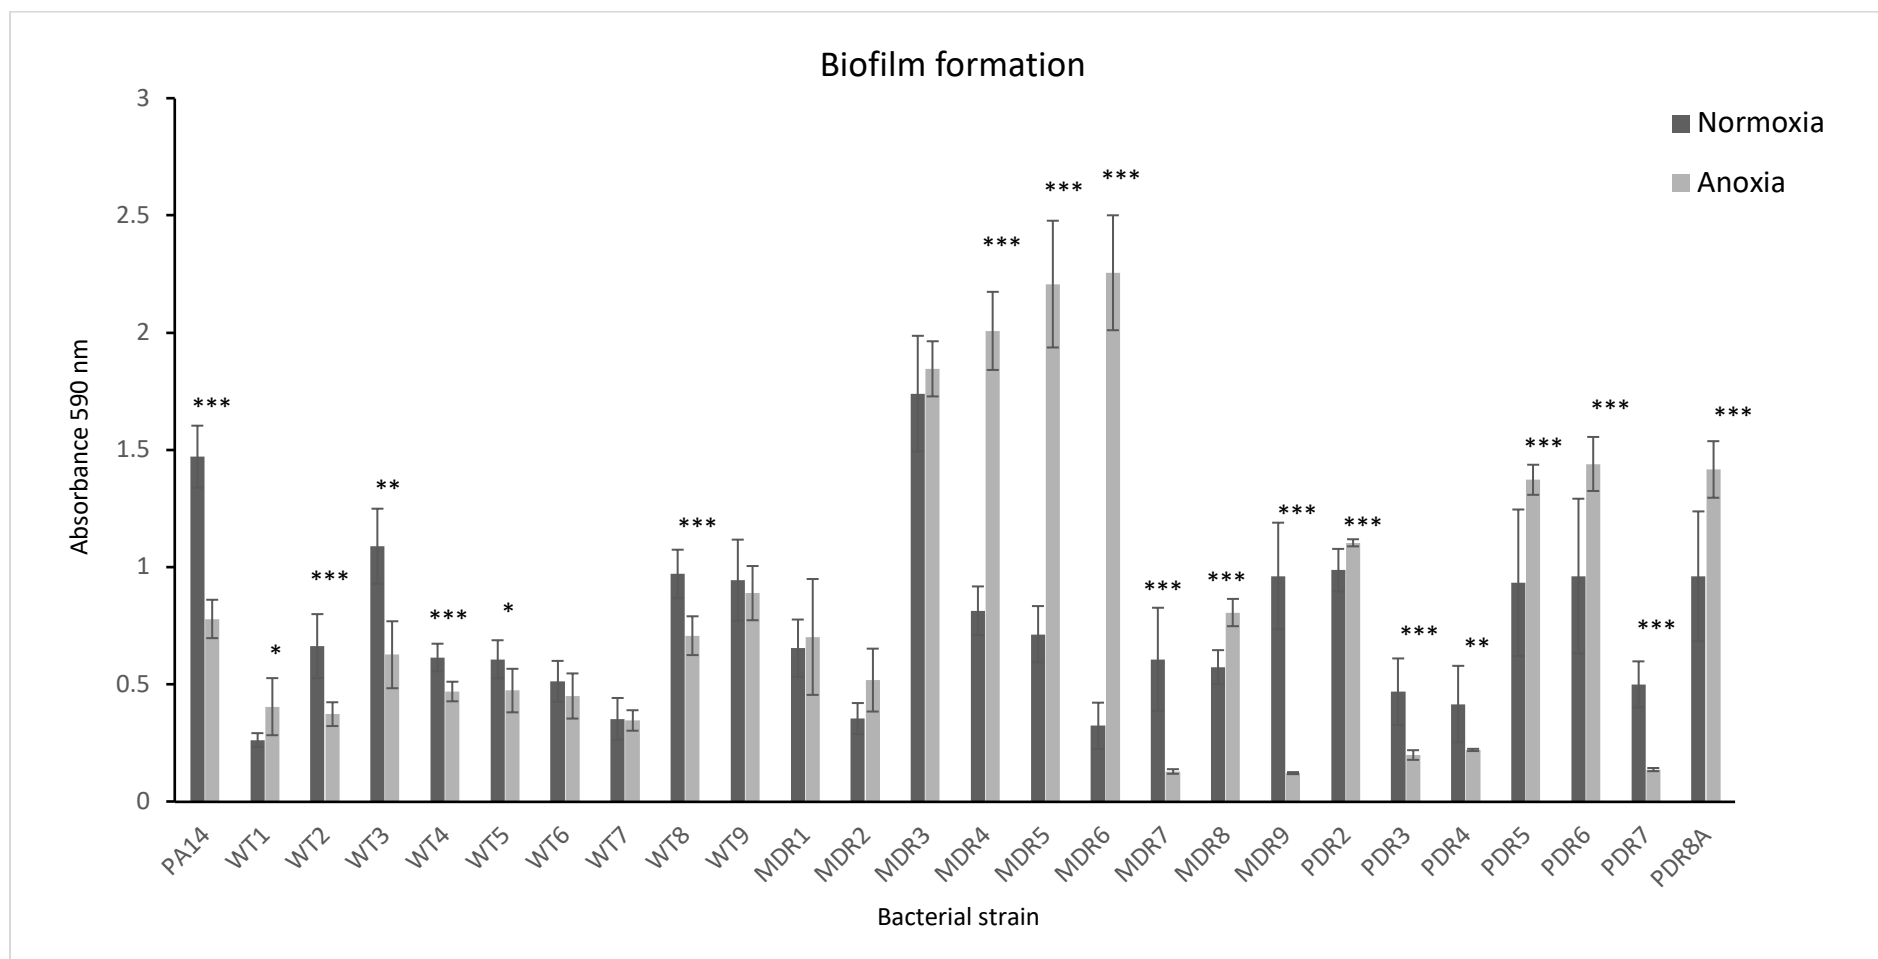

**Figure S3.** Biofilm formation of *P. aeruginosa* clinical and reference strains. Biofilm formation was evaluated after 18 h of incubation in polystyrene plates at 37 °C in normoxia and anoxia. Data are reported as OD at 590 nm after crystal violet staining. Each data point represents the mean  $\pm$  SD of 4 independent experiments, each performed in 6-replicates. Error bars indicate the standard deviations of all the measurements. Statistical difference was determined by Student's T-test: \*  $p < 0.05$ ; \*\*  $p < 0.01$ , \*\*\*  $p < 0.001$  compared with the control. WT: wild type, sensitive strains; MDR: multi-drug resistant strains; PDR: pan-drug resistant strains.

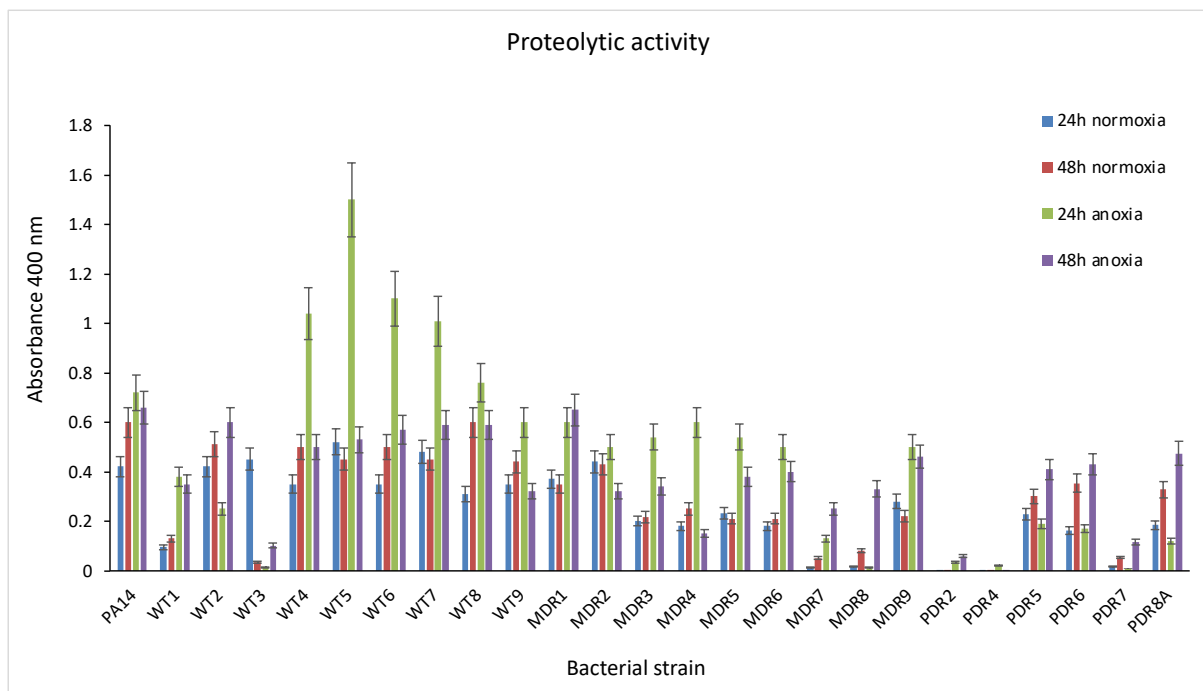

**Figure S4.** Protease production of different clinical strains and PA14 reference strain at 24 h and 48 h in normoxia and anoxia. Data are expressed as azocasein absorbance normalized for OD of each bacterial culture. Error bars indicated the standard deviations of all the measurements. WT: wild type, sensitive strains; MDR: multi-drug resistant strains; PDR: pan-drug resistant strains.

Table S1: Diameters of swimming motility of WT, MDR and PRD strains at 24, 48 and 72 h in normoxia and anoxia, respectively.

| <b>Normoxy</b> | 24h (cm)  | 48h (cm)  | 72h (cm)  |
|----------------|-----------|-----------|-----------|
| PA14           | 2.3 ± 0.2 | 2.9 ± 0.2 | 3.2 ± 0.3 |
| WT1            | 2.9 ± 0.2 | 3.6 ± 0.3 | 4.2 ± 0.4 |
| WT2            | 3.2 ± 0.3 | 3.8 ± 0.4 | 4.5 ± 0.4 |
| WT3            | 1.9 ± 0.2 | 2.9 ± 0.2 | 3.2 ± 0.3 |
| WT4            | 3.2 ± 0.3 | 4.8 ± 0.5 | 4.8 ± 0.5 |
| WT5            | 1.8 ± 0.2 | 2.5 ± 0.2 | 2.9 ± 0.3 |
| WT6            | 2.9 ± 0.3 | 3.7 ± 0.4 | 3.9 ± 0.4 |
| WT7            | 2.9 ± 0.3 | 3.5 ± 0.3 | 3.7 ± 0.4 |
| WT8            | 0.5 ± 0.0 | 0.6 ± 0.1 | 0.6 ± 0.1 |
| WT9            | 2.3 ± 0.2 | 2.9 ± 0.3 | 3.6 ± 0.3 |
| MDR1           | 1.1 ± 0.1 | 1.5 ± 0.1 | 2.1 ± 0.2 |
| MDR2           | 2.0 ± 0.2 | 2.6 ± 0.2 | 2.8 ± 0.3 |
| MDR3           | 0.6 ± 0.1 | 1.4 ± 0.1 | 1.8 ± 0.2 |
| MDR4           | 0.9 ± 0.1 | 1.2 ± 0.1 | 1.6 ± 0.1 |
| MDR5           | 0.9 ± 0.1 | 1.5 ± 0.1 | 1.8 ± 0.2 |
| MDR6           | 0.9 ± 0.1 | 1.3 ± 0.1 | 1.6 ± 0.1 |
| MDR7           | 0.5 ± 0.0 | 0.5 ± 0.0 | 0.5 ± 0.0 |
| MDR8           | 0.5 ± 0.0 | 0.6 ± 0.1 | 1.0 ± 0.1 |
| MDR9           | 0.7 ± 0.1 | 1.2 ± 0.1 | 1.8 ± 0.2 |
| PDR2           | 0.9 ± 0.1 | 2.3 ± 0.2 | 2.6 ± 0.2 |
| PDR3           | 0.6 ± 0.1 | 0.6 ± 0.1 | 0.6 ± 0.1 |
| PDR4           | 0.6 ± 0.1 | 1.3 ± 0.1 | 1.4 ± 0.1 |
| PDR5           | 2.6 ± 0.2 | 3.2 ± 0.2 | 3.7 ± 0.3 |
| PDR6           | 2.4 ± 0.2 | 3.1 ± 0.3 | 3.5 ± 0.3 |
| PDR7           | 0.5 ± 0.0 | 1.4 ± 0.1 | 2.1 ± 0.2 |
| PDR8A          | 1.0 ± 0.1 | 2.1 ± 0.2 | 2.6 ± 0.2 |

| <b>Anoxia</b> | 24h (cm)  | 48h (cm)  | 72h (cm)  |
|---------------|-----------|-----------|-----------|
| PA14          | 1.3 ± 0.1 | 1.6 ± 0.1 | 1.9 ± 0.2 |
| WT1           | 2.6 ± 0.2 | 4.5 ± 0.4 | 4.8 ± 0.5 |
| WT2           | 0.5 ± 0.0 | 0.5 ± 0.0 | 0.5 ± 0.0 |
| WT3           | 1.0 ± 0.1 | 1.6 ± 0.1 | 1.8 ± 0.1 |
| WT4           | 1.3 ± 0.1 | 1.9 ± 0.2 | 2.3 ± 0.2 |
| WT5           | 0.3 ± 0.0 | 0.3 ± 0.0 | 0.3 ± 0.0 |
| WT6           | 2.3 ± 0.1 | 3.0 ± 0.3 | 3.8 ± 0.3 |
| WT7           | 1.0 ± 0.1 | 2.5 ± 0.2 | 2.9 ± 0.3 |
| WT8           | 0.3 ± 0.0 | 0.5 ± 0.0 | 0.5 ± 0.0 |
| WT9           | 2.1 ± 0.2 | 3.5 ± 0.3 | 3.9 ± 0.4 |
| MDR1          | 0.6 ± 0.1 | 1.6 ± 0.1 | 1.8 ± 0.2 |
| MDR2          | 0.3 ± 0.0 | 0.3 ± 0.0 | 0.3 ± 0.0 |
| MDR3          | 0.6 ± 0.1 | 0.9 ± 0.1 | 0.9 ± 0.1 |
| MDR4          | 0.6 ± 0.1 | 1.9 ± 0.2 | 1.9 ± 0.2 |
| MDR5          | 0.5 ± 0.0 | 0.8 ± 0.1 | 1.2 ± 0.1 |
| MDR6          | 0.5 ± 0.0 | 0.8 ± 0.1 | 0.9 ± 0.1 |
| MDR7          | 0.4 ± 0.0 | 0.4 ± 0.0 | 0.4 ± 0.0 |
| MDR8          | 0.4 ± 0.0 | 0.4 ± 0.0 | 0.4 ± 0.0 |
| MDR9          | 0.6 ± 0.1 | 1.3 ± 0.1 | 1.5 ± 0.1 |
| PDR2          | 0.8 ± 0.1 | 1.6 ± 0.1 | 2.0 ± 0.2 |
| PDR3          | 0.5 ± 0.0 | 0.5 ± 0.0 | 0.5 ± 0.0 |
| PDR4          | 0.6 ± 0.1 | 0.6 ± 0.1 | 0.6 ± 0.1 |
| PDR5          | 2.1 ± 0.2 | 2.6 ± 0.2 | 3.2 ± 0.3 |
| PDR6          | 0.4 ± 0.0 | 0.4 ± 0.0 | 0.4 ± 0.0 |
| PDR7          | 0.3 ± 0.0 | 0.3 ± 0.0 | 0.3 ± 0.0 |
| PDR8A         | 1.3 ± 0.1 | 2.6 ± 0.3 | 2.6 ± 0.3 |

Table S2: Diameters of swarming motility of WT, MDR and PRD strains at 24, 48 and 72 h in normoxia and anoxia, respectively.

| <b>Normoxy</b> | 24h (cm)  | 48h (cm)  | 72h (cm)  |
|----------------|-----------|-----------|-----------|
| PA14           | 1.0 ± 0.1 | 1.1 ± 0.1 | 1.3 ± 0.1 |
| WT1            | 1.0 ± 0.1 | 1.3 ± 0.1 | 1.5 ± 0.2 |
| WT2            | 1.3 ± 0.1 | 1.6 ± 0.1 | 1.6 ± 0.2 |
| WT3            | 1.0 ± 0.1 | 1.3 ± 0.1 | 1.6 ± 0.1 |
| WT4            | 1.3 ± 0.1 | 1.3 ± 0.1 | 1.3 ± 0.1 |
| WT5            | 1.0 ± 0.1 | 1.1 ± 0.1 | 1.3 ± 0.1 |
| WT6            | 1.0 ± 0.1 | 1.0 ± 0.1 | 1.3 ± 0.1 |
| WT7            | 1.0 ± 0.1 | 1.1 ± 0.1 | 1.3 ± 0.1 |
| WT8            | 0.6 ± 0.1 | 0.6 ± 0.1 | 0.6 ± 0.1 |
| WT9            | 1.6 ± 0.2 | 1.6 ± 0.2 | 1.6 ± 0.2 |
| MDR1           | 1.0 ± 0.1 | 1.0 ± 0.1 | 1.1 ± 0.1 |
| MDR2           | 1.6 ± 0.1 | 1.6 ± 0.1 | 1.6 ± 0.1 |
| MDR3           | 0.6 ± 0.1 | 0.8 ± 0.1 | 1.0 ± 0.1 |
| MDR4           | 0.6 ± 0.1 | 1.0 ± 0.1 | 1.0 ± 0.1 |
| MDR5           | 0.6 ± 0.1 | 0.8 ± 0.1 | 1.0 ± 0.1 |
| MDR6           | 0.8 ± 0.1 | 1.0 ± 0.1 | 1.0 ± 0.1 |
| MDR7           | 0.6 ± 0.1 | 0.6 ± 0.1 | 0.6 ± 0.1 |
| MDR8           | 0.6 ± 0.1 | 0.6 ± 0.1 | 0.6 ± 0.1 |
| MDR9           | 0.6 ± 0.1 | 0.9 ± 0.1 | 1.5 ± 0.1 |
| PDR2           | 0.3 ± 0.0 | 0.6 ± 0.1 | 0.8 ± 0.1 |
| PDR3           | 0.6 ± 0.1 | 0.6 ± 0.1 | 0.8 ± 0.0 |
| PDR4           | 0.3 ± 0.0 | 0.3 ± 0.0 | 0.3 ± 0.0 |
| PDR5           | 1.8 ± 0.1 | 1.9 ± 0.2 | 2.0 ± 0.2 |
| PDR6           | 1.6 ± 0.1 | 1.9 ± 0.1 | 2.1 ± 0.2 |
| PDR7           | 0.6 ± 0.1 | 0.7 ± 0.1 | 0.8 ± 0.1 |
| PDR8A          | 1.0 ± 0.1 | 1.0 ± 0.1 | 1.0 ± 0.1 |

| <b>Anoxia</b> | 24h (cm)  | 48h (cm)  | 72h (cm)  |
|---------------|-----------|-----------|-----------|
| PA14          | 0.6 ± 0.1 | 0.6 ± 0.1 | 0.9 ± 0.1 |
| WT1           | 0.6 ± 0.1 | 0.7 ± 0.0 | 0.9 ± 0.1 |
| WT2           | 0.3 ± 0.0 | 0.3 ± 0.0 | 0.3 ± 0.0 |
| WT3           | 0.6 ± 0.1 | 1.0 ± 0.1 | 1.3 ± 0.1 |
| WT4           | 0.6 ± 0.1 | 0.6 ± 0.1 | 0.6 ± 0.1 |
| WT5           | 0.6 ± 0.1 | 0.6 ± 0.1 | 0.6 ± 0.1 |
| WT6           | 0.8 ± 0.1 | 1.3 ± 0.1 | 1.3 ± 0.1 |
| WT7           | 0.6 ± 0.1 | 0.6 ± 0.1 | 0.8 ± 0.1 |
| WT8           | 0.3 ± 0.0 | 0.5 ± 0.0 | 0.5 ± 0.0 |
| WT9           | 0.8 ± 0.1 | 0.8 ± 0.1 | 0.8 ± 0.1 |
| MDR1          | 0.6 ± 0.1 | 0.6 ± 0.1 | 0.6 ± 0.1 |
| MDR2          | 0.3 ± 0.0 | 0.5 ± 0.0 | 0.5 ± 0.0 |
| MDR3          | 0.6 ± 0.1 | 0.6 ± 0.1 | 0.6 ± 0.1 |
| MDR4          | 0.8 ± 0.1 | 0.8 ± 0.1 | 0.8 ± 0.1 |
| MDR5          | 0.6 ± 0.1 | 0.6 ± 0.1 | 0.6 ± 0.1 |
| MDR6          | 0.6 ± 0.1 | 0.6 ± 0.1 | 0.6 ± 0.1 |
| MDR7          | 0.5 ± 0.0 | 0.5 ± 0.0 | 0.5 ± 0.0 |
| MDR8          | 0.6 ± 0.1 | 0.6 ± 0.1 | 0.6 ± 0.1 |
| MDR9          | 0.6 ± 0.1 | 0.6 ± 0.1 | 0.6 ± 0.1 |
| PDR2          | 0.3 ± 0.0 | 0.6 ± 0.1 | 0.6 ± 0.1 |
| PDR3          | 0.5 ± 0.0 | 0.5 ± 0.0 | 0.5 ± 0.0 |
| PDR4          | 0.3 ± 0.0 | 0.3 ± 0.0 | 0.3 ± 0.0 |
| PDR5          | 0.6 ± 0.1 | 0.8 ± 0.1 | 1.0 ± 0.1 |
| PDR6          | 0.4 ± 0.0 | 0.5 ± 0.0 | 0.6 ± 0.1 |
| PDR7          | 0.3 ± 0.0 | 0.3 ± 0.0 | 0.3 ± 0.0 |
| PDR8A         | 0.8 ± 0.1 | 0.9 ± 0.1 | 1.0 ± 0.1 |
